# Supplementary material for: Three new species of Byrsopteryx Flint microcaddisflies from Peru (Insecta: Trichoptera) including DNA-based larval associations
Source: PeerJ journal article supplement (doi:10.7717/peerj.12645), 2021-12-24
Supplement: SupplementaryTable1.pdf [file SupplementaryTable1.pdf]

Supplementary Table 1. K2P distances among 20 COI sequences of nine *Byrsopteryx* species sampled.

|                                    | <i>C. edwardsi</i> HQ971758 | <i>B. carioca</i> ENT0056 ♂ | <i>B. espinhosa</i> ENT0005 ♂ | <i>B. inti</i> ENT0702 ♂ | <i>B. mamaoclo</i> ENT0703 ♂ | <i>B. mamaoclo</i> ENT5519 larva | <i>B. mamaoclo</i> ENT5516 ♂ | <i>B. esparta</i> ENT0123 ♂ | <i>B. tapanti</i> HQ971757 | <i>B. gomezi</i> AF436490 | <i>B. gomezi</i> KX107513 | <i>B. abrelata</i> ENT0068 ♂ | <i>B. mancocapac</i> ENT0704 ♂ | <i>B. mancocapac</i> ENT5408 larva | <i>B. mancocapac</i> ENT5410 larva | <i>B. mancocapac</i> ENT5494 ♂ | <i>B. mancocapac</i> ENT5414 larva | <i>B. mancocapac</i> ENT5413 larva | <i>B. mancocapac</i> ENT5409 larva | <i>B. mancocapac</i> ENT5411 larva |
|------------------------------------|-----------------------------|-----------------------------|-------------------------------|--------------------------|------------------------------|----------------------------------|------------------------------|-----------------------------|----------------------------|---------------------------|---------------------------|------------------------------|--------------------------------|------------------------------------|------------------------------------|--------------------------------|------------------------------------|------------------------------------|------------------------------------|------------------------------------|
| <i>C. edwardsi</i> HQ971758        |                             | 0.2264                      | 0.2613                        | 0.2661                   | 0.2495                       | 0.2641                           | 0.2623                       | 0.2319                      | 0.2306                     | 0.2504                    | 0.2258                    | 0.2528                       | 0.2175                         | 0.2256                             | 0.2199                             | 0.2331                         | 0.2268                             | 0.2298                             | 0.2287                             | 0.2456                             |
| <i>B. carioca</i> ENT0056 ♂        | 0.2264                      |                             | 0.2356                        | 0.2548                   | 0.2404                       | 0.2469                           | 0.2483                       | 0.2216                      | 0.2565                     | 0.2388                    | 0.2388                    | 0.2161                       | 0.2435                         | 0.2387                             | 0.2335                             | 0.2376                         | 0.2338                             | 0.2166                             | 0.2400                             | 0.2370                             |
| <i>B. espinhosa</i> ENT0005 ♂      | 0.2613                      | 0.2356                      |                               | 0.1846                   | 0.2060                       | 0.2158                           | 0.2169                       | 0.2084                      | 0.2156                     | 0.2082                    | 0.2017                    | 0.1995                       | 0.2077                         | 0.1952                             | 0.2151                             | 0.2014                         | 0.2024                             | 0.1960                             | 0.2092                             | 0.2102                             |
| <i>B. inti</i> ENT0702 ♂           | 0.2661                      | 0.2548                      | 0.1846                        |                          | 0.1675                       | 0.1492                           | 0.1499                       | 0.1868                      | 0.1752                     | 0.1691                    | 0.1810                    | 0.2127                       | 0.2259                         | 0.2272                             | 0.2310                             | 0.2284                         | 0.2181                             | 0.2066                             | 0.2202                             | 0.2294                             |
| <i>B. mamaoclo</i> ENT0703 ♂       | 0.2495                      | 0.2404                      | 0.2060                        | 0.1675                   |                              | 0.0074                           | 0.0049                       | 0.1949                      | 0.2208                     | 0.2199                    | 0.2211                    | 0.2363                       | 0.2211                         | 0.2205                             | 0.2319                             | 0.2320                         | 0.2216                             | 0.2186                             | 0.2259                             | 0.2215                             |
| <i>B. mamaoclo</i> ENT5519 larva   | 0.2641                      | 0.2469                      | 0.2158                        | 0.1492                   | 0.0074                       |                                  | 0.0000                       | 0.2068                      | 0.2168                     | 0.2204                    | 0.2231                    | 0.2606                       | 0.2198                         | 0.2205                             | 0.2229                             | 0.2172                         | 0.2122                             | 0.2064                             | 0.2151                             | 0.2215                             |
| <i>B. mamaoclo</i> ENT5516 ♂       | 0.2623                      | 0.2483                      | 0.2169                        | 0.1499                   | 0.0049                       | 0.0000                           |                              | 0.2079                      | 0.2180                     | 0.2210                    | 0.2210                    | 0.2589                       | 0.2210                         | 0.2205                             | 0.2241                             | 0.2184                         | 0.2135                             | 0.2079                             | 0.2163                             | 0.2215                             |
| <i>B. esparta</i> ENT0123 ♂        | 0.2319                      | 0.2216                      | 0.2084                        | 0.1868                   | 0.1949                       | 0.2068                           | 0.2079                       |                             | 0.1684                     | 0.1562                    | 0.1585                    | 0.2291                       | 0.2390                         | 0.2546                             | 0.2514                             | 0.2489                         | 0.2409                             | 0.2322                             | 0.2427                             | 0.2514                             |
| <i>B. tapanti</i> HQ971757         | 0.2306                      | 0.2565                      | 0.2156                        | 0.1752                   | 0.2208                       | 0.2168                           | 0.2180                       | 0.1684                      |                            | 0.1228                    | 0.1336                    | 0.2127                       | 0.2178                         | 0.2181                             | 0.2279                             | 0.2223                         | 0.2036                             | 0.2073                             | 0.2080                             | 0.2112                             |
| <i>B. gomezi</i> AF436490          | 0.2504                      | 0.2388                      | 0.2082                        | 0.1691                   | 0.2199                       | 0.2204                           | 0.2210                       | 0.1562                      | 0.1228                     |                           | 0.0000                    | 0.2202                       | 0.2340                         | 0.2175                             | 0.2370                             | 0.2346                         | 0.2307                             | 0.2120                             | 0.2265                             | 0.2105                             |
| <i>B. gomezi</i> KX107513          | 0.2258                      | 0.2388                      | 0.2017                        | 0.1810                   | 0.2211                       | 0.2231                           | 0.2210                       | 0.1585                      | 0.1336                     | 0.0000                    |                           | 0.2249                       | 0.2178                         | 0.2175                             | 0.2199                             | 0.2196                         | 0.2108                             | 0.2043                             | 0.2129                             | 0.2105                             |
| <i>B. abrelata</i> ENT0068 ♂       | 0.2528                      | 0.2161                      | 0.1995                        | 0.2127                   | 0.2363                       | 0.2606                           | 0.2589                       | 0.2291                      | 0.2127                     | 0.2202                    | 0.2249                    |                              | 0.2071                         | 0.2049                             | 0.2038                             | 0.1985                         | 0.2023                             | 0.1908                             | 0.2017                             | 0.1915                             |
| <i>B. mancocapac</i> ENT0704 ♂     | 0.2175                      | 0.2435                      | 0.2077                        | 0.2259                   | 0.2211                       | 0.2198                           | 0.2210                       | 0.2390                      | 0.2178                     | 0.2340                    | 0.2178                    | 0.2071                       |                                | 0.0000                             | 0.0112                             | 0.0096                         | 0.0102                             | 0.0074                             | 0.0067                             | 0.0061                             |
| <i>B. mancocapac</i> ENT5408 larva | 0.2256                      | 0.2387                      | 0.1952                        | 0.2272                   | 0.2205                       | 0.2205                           | 0.2205                       | 0.2546                      | 0.2181                     | 0.2175                    | 0.2175                    | 0.2049                       | 0.0000                         |                                    | 0.0137                             | 0.0055                         | 0.0082                             | 0.0066                             | 0.0054                             | 0.0061                             |
| <i>B. mancocapac</i> ENT5410 larva | 0.2199                      | 0.2335                      | 0.2151                        | 0.2310                   | 0.2319                       | 0.2229                           | 0.2241                       | 0.2514                      | 0.2279                     | 0.2370                    | 0.2199                    | 0.2038                       | 0.0112                         | 0.0137                             |                                    | 0.0134                         | 0.0099                             | 0.0047                             | 0.0059                             | 0.0092                             |
| <i>B. mancocapac</i> ENT5494 ♂     | 0.2331                      | 0.2376                      | 0.2014                        | 0.2284                   | 0.2320                       | 0.2172                           | 0.2184                       | 0.2489                      | 0.2223                     | 0.2346                    | 0.2196                    | 0.1985                       | 0.0096                         | 0.0055                             | 0.0134                             |                                | 0.0061                             | 0.0073                             | 0.0061                             | 0.0000                             |
| <i>B. mancocapac</i> ENT5414 larva | 0.2268                      | 0.2338                      | 0.2024                        | 0.2181                   | 0.2216                       | 0.2122                           | 0.2135                       | 0.2409                      | 0.2036                     | 0.2307                    | 0.2108                    | 0.2023                       | 0.0102                         | 0.0082                             | 0.0099                             | 0.0061                         |                                    | 0.0019                             | 0.0034                             | 0.0030                             |
| <i>B. mancocapac</i> ENT5413 larva | 0.2298                      | 0.2166                      | 0.1960                        | 0.2066                   | 0.2186                       | 0.2064                           | 0.2079                       | 0.2322                      | 0.2073                     | 0.2120                    | 0.2043                    | 0.1908                       | 0.0074                         | 0.0066                             | 0.0047                             | 0.0073                         | 0.0019                             |                                    | 0.0000                             | 0.0000                             |
| <i>B. mancocapac</i> ENT5409 larva | 0.2287                      | 0.2400                      | 0.2092                        | 0.2202                   | 0.2259                       | 0.2151                           | 0.2163                       | 0.2427                      | 0.2080                     | 0.2265                    | 0.2129                    | 0.2017                       | 0.0067                         | 0.0054                             | 0.0059                             | 0.0061                         | 0.0034                             | 0.0000                             |                                    | 0.0000                             |
| <i>B. mancocapac</i> ENT5411 larva | 0.2456                      | 0.2370                      | 0.2102                        | 0.2294                   | 0.2215                       | 0.2215                           | 0.2215                       | 0.2514                      | 0.2112                     | 0.2105                    | 0.2105                    | 0.1915                       | 0.0061                         | 0.0061                             | 0.0092                             | 0.0000                         | 0.0030                             | 0.0000                             | 0.0000                             |                                    |
